# Supplementary material for: One-pot synthesis of iniferter-bound polystyrene core nanoparticles for the controlled grafting of multilayer shells
Source: Royal Society of Chemistry journal article supplement (doi:10.1039/c3nr05295h), 2013-12-20
Supplement: c3nr05295h.pdf [file c3nr05295h.pdf]

# Supplementary Information

## One-pot synthesis of iniferter-bound polystyrene core nanoparticles for the controlled grafting of multilayer shells

Nataliya Marchyk<sup>‡</sup>, Jacqueline Maximilien<sup>‡</sup>, Selim Beyazit, Karsten Haupt\*, Bernadette Tse Sum Bui\*

Compiègne University of Technology, CNRS Enzyme and Cell Engineering Laboratory, Rue Roger Couttolenc, CS 60319, 60203 Compiègne Cedex, France.

E-mail: [jeanne.tse-sum-bui@utc.fr](mailto:jeanne.tse-sum-bui@utc.fr); Fax: (+) 33 3 44203910; Tel: 33 3 44234402

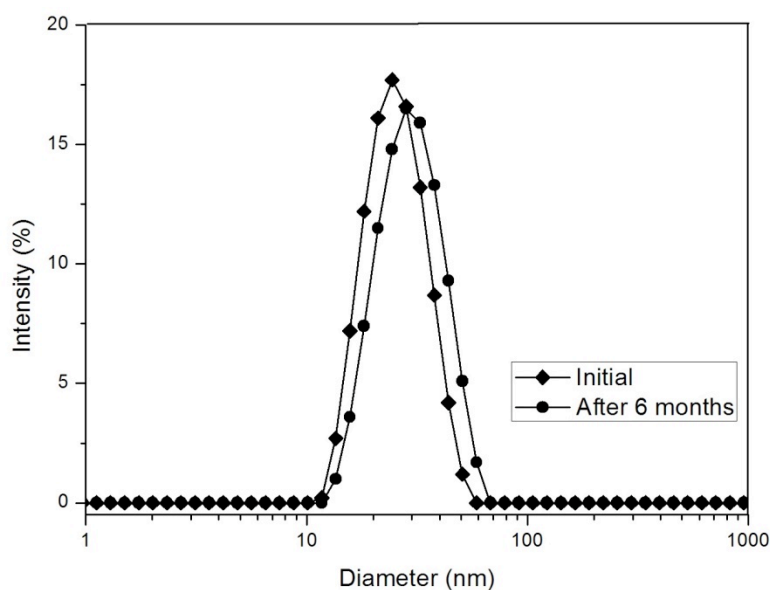

**Figure S1.** Size distribution, as measured by dynamic light scattering of fluorescent PS cores immediately after synthesis and after 6 months storage at 8 °C.

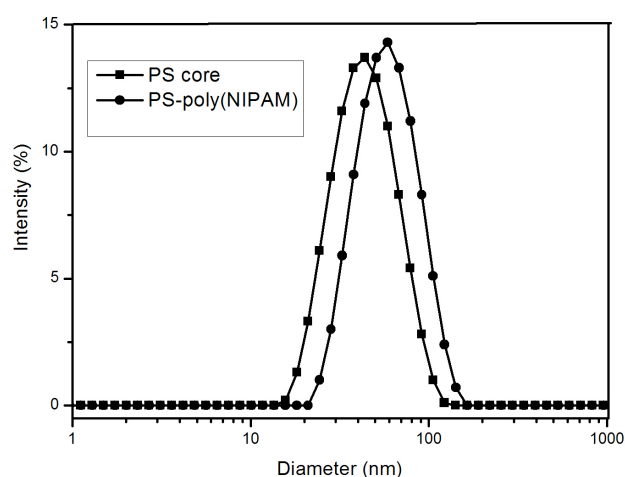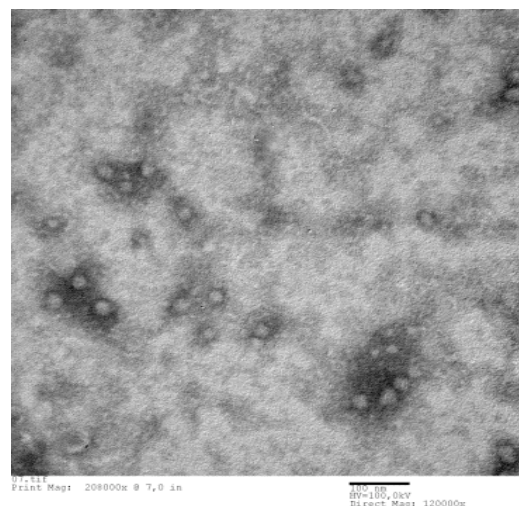

**Figure S2.** Size distributions, as measured by dynamic light scattering of the increase in size of PS core after grafting of linear poly(NIPAM) shell (left). TEM image of PS core-poly(NIPAM) shell, the scale represents 100 nm (right).

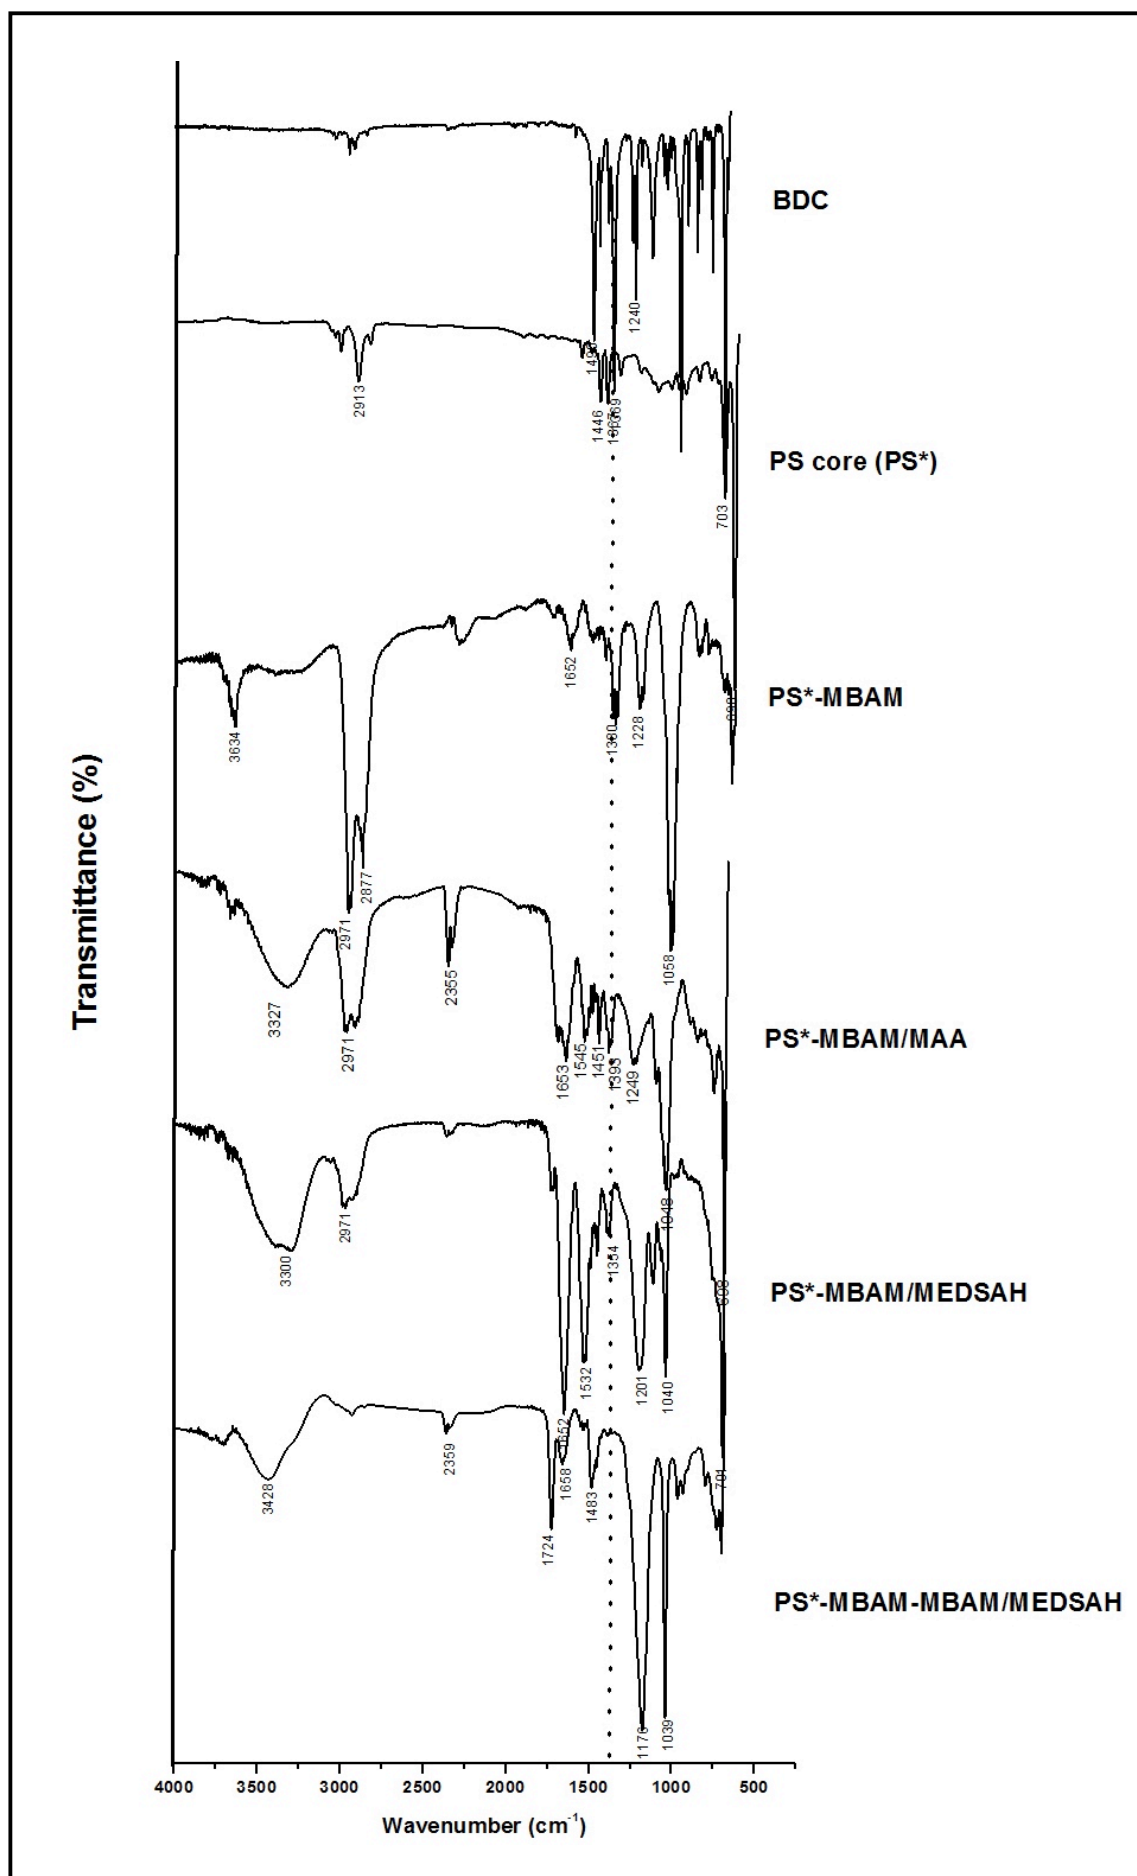

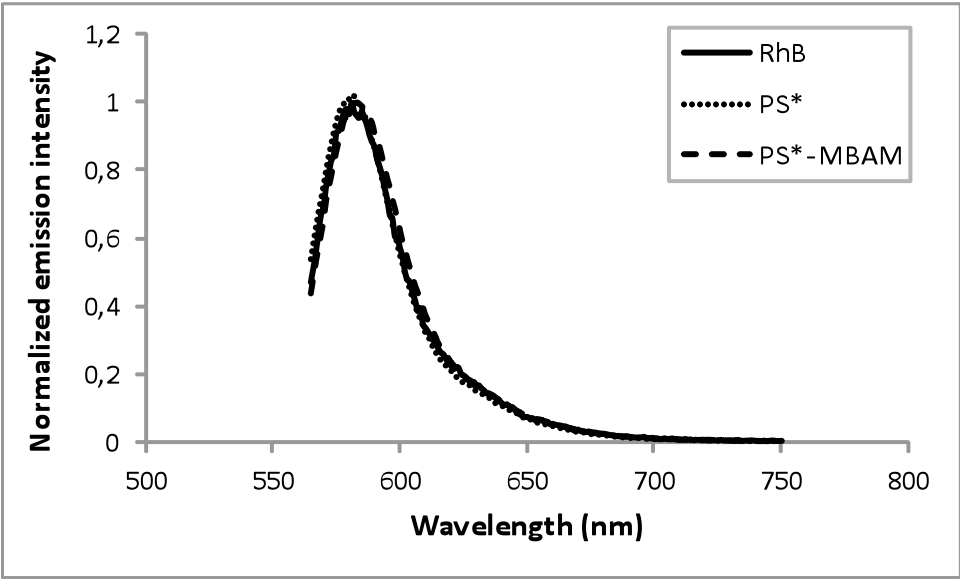

**Figure S4.** Normalised fluorescence emission intensities of RhB, fluorescent PS core (PS\*) and PS\*-MBAM NPs in water. Excitation wavelength is 556 nm.

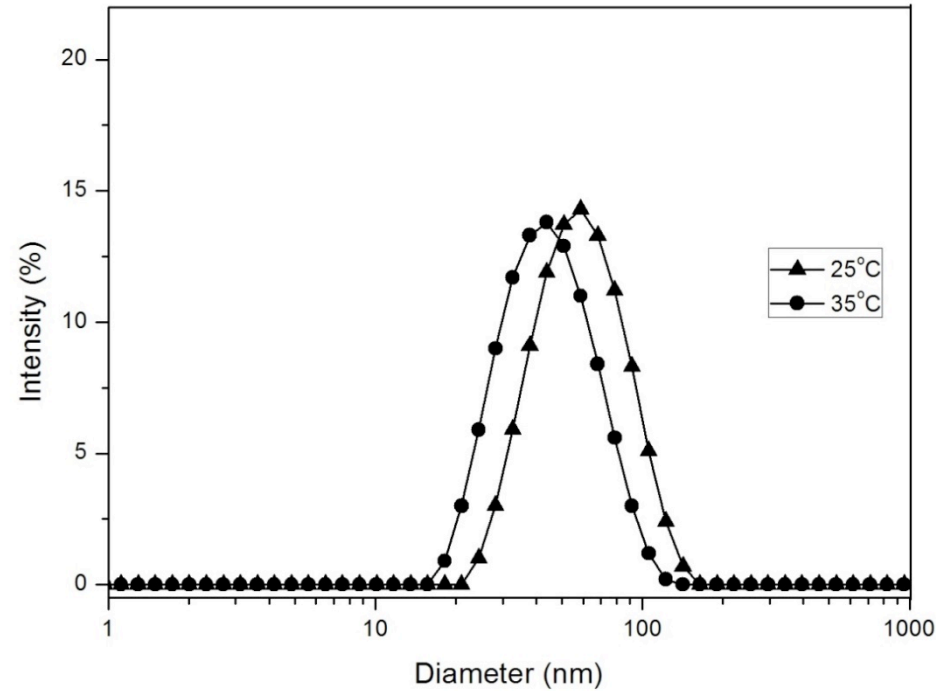

**Figure S5:** Size distributions, as measured by dynamic light scattering showing thermoresponsivity of PS-MBAM/NIPAM. Sizes are 61 and 47 nm at 25 °C and 35 °C respectively.
